# Supplementary material for: Inactivation of Zeb1 in GRHL2-deficient mouse embryos rescues mid-gestation viability and secondary palate closure
Source: PubMed Central journal article supplement (PMC7104862; doi:10.1242/dmm.042218), 2020-03-25
Supplement: dmm-13-042218-s1.pdf [file dmm-13-042218-s1.pdf]

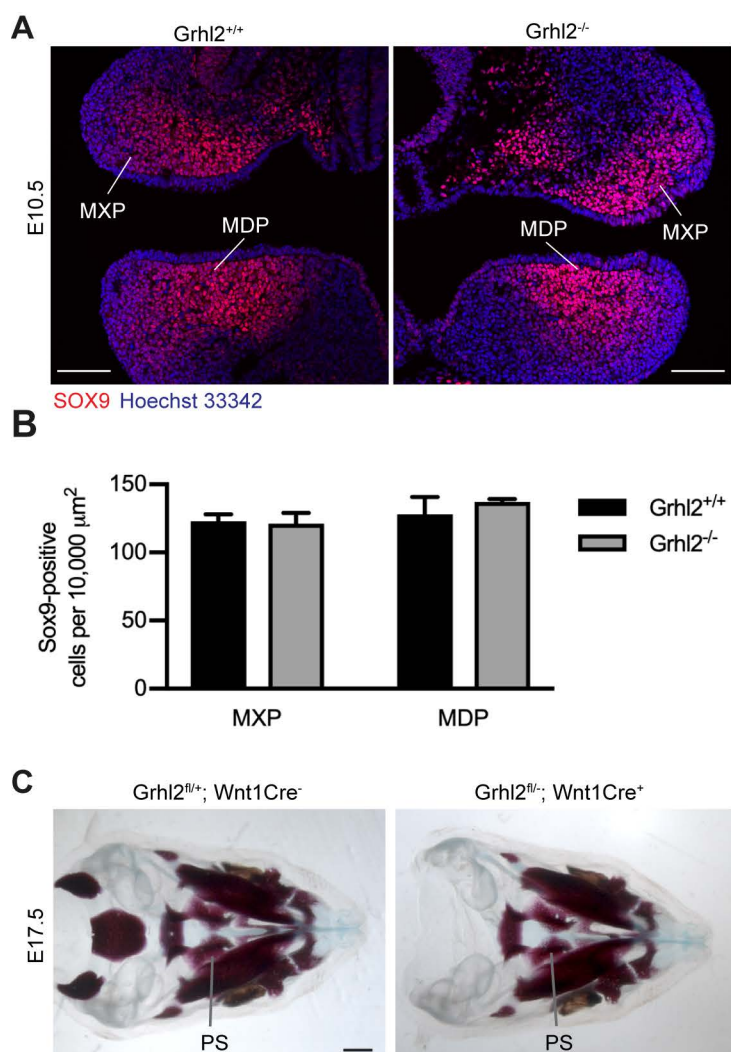

**Figure S1: Grhl2 is not required in neural crest for palate closure.**

**A** Coronal sections through E10.5 PA1 stained for SOX9 in red and DNA in blue. SOX9-positive neural crest cells are present in similar numbers in mesenchyme of wild-type and *Grhl2*<sup>-/-</sup> PA1. Scale bars = 100  $\mu\text{m}$ . **B** Quantification of the number of SOX9-positive cells per 10,000  $\mu\text{m}^2$  in the MXP or MDP mesenchyme. N=3-4 embryos. Bars show means and error bars show s.d. There was no significant difference between genotypes using an unpaired T-test. **C** Images of the ventral side of E17.5 embryo head skeletal preparations stained with alizarin red and alcian blue. Image representative of 2 *Grhl2*<sup>fl/+</sup>; *Wnt1Cre*<sup>-</sup> and 3 *Grhl2*<sup>fl/+</sup>; *Wnt1Cre*<sup>+</sup> embryos. Scale bar = 1mm. MXP maxillary process, MDP mandibular process, PS palatal shelf.

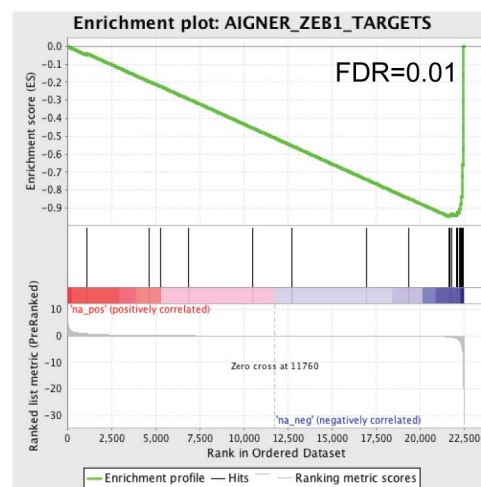

**Figure S2: Genes repressed by ZEB1 are down-regulated in *Grhl2*<sup>-/-</sup> PA1.**

Gene set enrichment analysis plot showing down-regulation of ZEB1 target genes in *Grhl2*<sup>-/-</sup> PA1. False discovery rate (FDR) = 0.01.

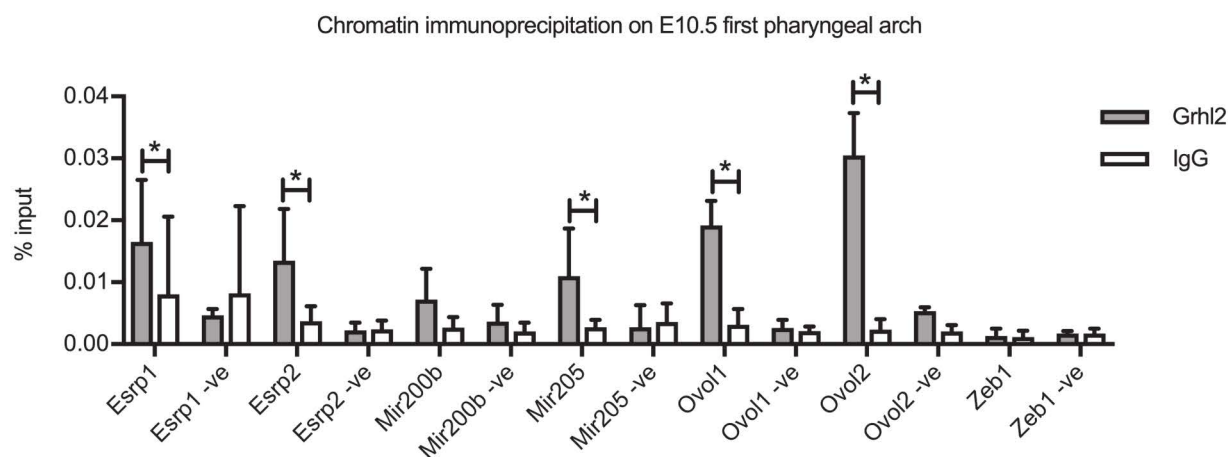

**Figure S3: GRHL2 binding in E10.5 ChIP is specific.**

ChIP on E10.5 PA1 with Grhl2 or IgG antibody followed by QPCR with primers spanning predicted GRHL2 binding sites or negative control (-ve) sites spaced 1-1.5 kb away. Results are representative of three independent experiments. \* $p < 0.05$  by unpaired t-test. Graph shows mean  $\pm$  s.d. of quadruplicate QPCRs.



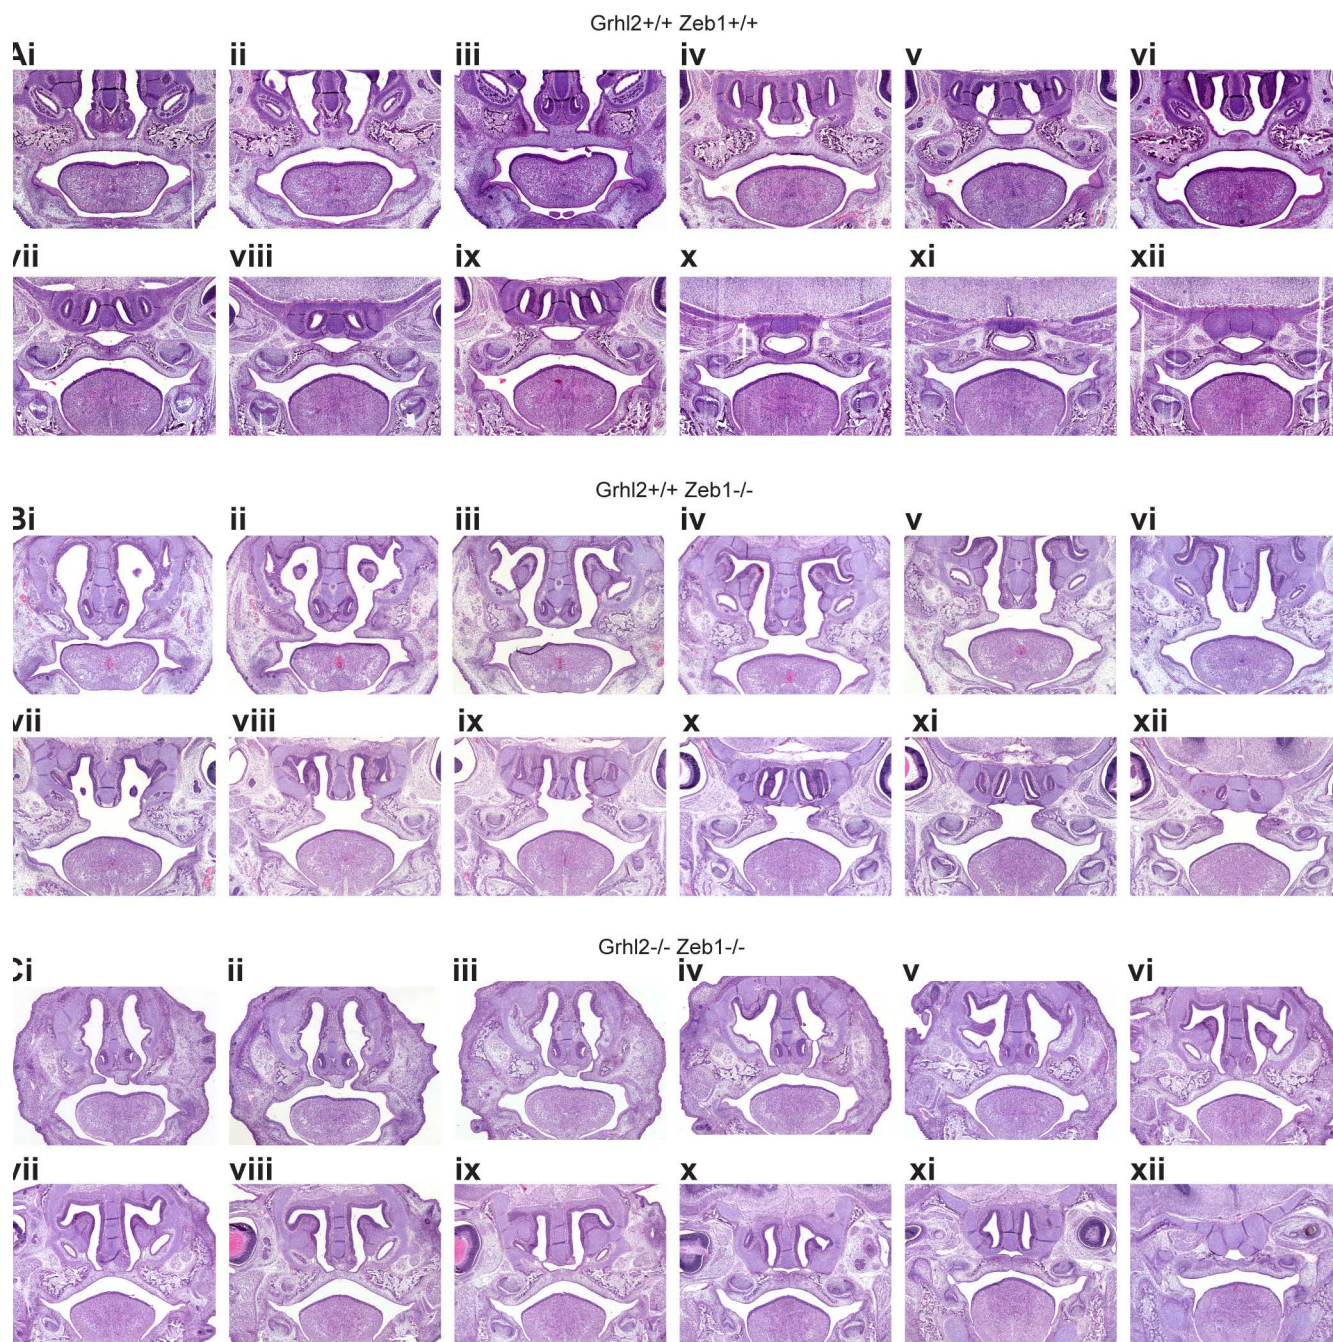

**Figure S4: Serial sections show rescued palate closure in *Grhl2*<sup>-/-</sup>;*Zeb1*<sup>-/-</sup> embryos.**

Serial coronal sections through E17.5 embryo heads showing anterior to posterior palate. **A** *Grhl2*<sup>+/+</sup>;*Zeb1*<sup>+/+</sup> **B** *Grhl2*<sup>+/+</sup>;*Zeb1*<sup>-/-</sup> **C** *Grhl2*<sup>-/-</sup>;*Zeb1*<sup>-/-</sup>. Sections **i-xii** are spaced at 100  $\mu$ m intervals. Images are representative of three embryos of each genotype. Scale bar = 500  $\mu$ m.

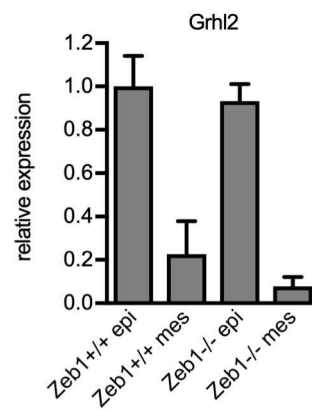

**Figure S5: *Grhl2* expression is not elevated in *Zeb1*<sup>-/-</sup> PA1 mesenchyme.**

Q-RT-PCR for *Grhl2* was performed on E10.5 PA1 epithelium and mesenchyme. N= 4 embryos of each genotype. Bars show mean and error bars show s.d.

**Table S1: Genes down-regulated in *Grhl2*<sup>-/-</sup> PA1**

| Ensembl ID         | Gene Name     | Fold Change (Grhl2KO/WT) | False discovery rate (FDR) |
|--------------------|---------------|--------------------------|----------------------------|
| ENSMUSG00000037129 | Tmprss13      | 0.01042875               | 0.00001284                 |
| ENSMUSG00000028786 | Tmem54        | 0.01225789               | 0.00002963                 |
| ENSMUSG00000027376 | Prom2         | 0.01347767               | 0.00000523                 |
| ENSMUSG00000056973 | Ces1d         | 0.01811811               | 0.00016228                 |
| ENSMUSG00000045027 | Prss22        | 0.01956068               | 0.00008712                 |
| ENSMUSG00000041886 | Macc1         | 0.02383779               | 0.00012180                 |
| ENSMUSG00000006143 | Upk3bl        | 0.02452580               | 0.00018641                 |
| ENSMUSG00000038980 | Rbbp8nl       | 0.02533125               | 0.00100901                 |
| ENSMUSG00000043088 | Il17re        | 0.04199613               | 0.00016382                 |
| ENSMUSG00000022595 | Lypd2         | 0.04347521               | 0.00019495                 |
| ENSMUSG00000032013 | Trim29        | 0.05854807               | 0.00000210                 |
| ENSMUSG00000029055 | Plch2         | 0.06142745               | 0.00000210                 |
| ENSMUSG00000037279 | Ovol2         | 0.06165359               | 0.00101306                 |
| ENSMUSG00000003309 | Ap1m2         | 0.06690453               | 0.00000475                 |
| ENSMUSG00000024922 | Ovol1         | 0.07381835               | 0.00170953                 |
| ENSMUSG00000008601 | Rab25         | 0.07408947               | 0.00014426                 |
| ENSMUSG00000028919 | Arhgef19      | 0.07416075               | 0.00000624                 |
| ENSMUSG00000050520 | Cldn8         | 0.07895543               | 0.00000644                 |
| ENSMUSG00000020159 | Gabrp         | 0.08718239               | 0.00402726                 |
| ENSMUSG00000032292 | Nr2e3         | 0.09052576               | 0.00378369                 |
| ENSMUSG00000055333 | Fat2          | 0.09354581               | 0.00000097                 |
| ENSMUSG00000027186 | Elf5          | 0.09650707               | 0.00883396                 |
| ENSMUSG00000057454 | Lypd3         | 0.09786669               | 0.00816630                 |
| ENSMUSG00000047501 | Cldn4         | 0.09973258               | 0.00000210                 |
| ENSMUSG00000031179 | 3830417A13Rik | 0.10447151               | 0.00402726                 |
| ENSMUSG00000006411 | Pvrl4         | 0.11454184               | 0.00114956                 |
| ENSMUSG00000028536 | 2610528J11Rik | 0.11794925               | 0.00230817                 |
| ENSMUSG00000022286 | Grhl2         | 0.12264177               | 0.00000210                 |
| ENSMUSG00000010080 | Epn3          | 0.12925474               | 0.00000644                 |
| ENSMUSG00000031995 | St14          | 0.13332928               | 0.00001578                 |
| ENSMUSG00000051397 | Tacstd2       | 0.13461888               | 0.00003766                 |
| ENSMUSG00000028392 | Bspry         | 0.13515180               | 0.00114956                 |
| ENSMUSG00000024479 | Mal2          | 0.13552181               | 0.00292285                 |
| ENSMUSG00000039457 | Ppl           | 0.14194177               | 0.00001284                 |
| ENSMUSG00000000216 | Scnn1g        | 0.14400022               | 0.00204157                 |
| ENSMUSG00000022900 | Ildr1         | 0.14507584               | 0.00086641                 |
| ENSMUSG00000053747 | Sox14         | 0.14521632               | 0.00204157                 |
| ENSMUSG00000053886 | Sh2d4a        | 0.15596843               | 0.00704642                 |
| ENSMUSG00000061527 | Krt5          | 0.15953955               | 0.00646324                 |
| ENSMUSG00000030800 | Prss8         | 0.16897038               | 0.00008712                 |
| ENSMUSG00000028115 | Bnip1         | 0.17008616               | 0.00024676                 |
| ENSMUSG00000074277 | Phldb3        | 0.17059179               | 0.00076754                 |
| ENSMUSG00000045394 | Epcam         | 0.17517541               | 0.00000798                 |
| ENSMUSG00000000303 | Cdh1          | 0.18034420               | 0.00001284                 |



|                    |          |            |            |
|--------------------|----------|------------|------------|
| ENSMUSG00000034382 | AI661453 | 0.20318844 | 0.00001898 |
| ENSMUSG00000034308 | Sdr42e1  | 0.20912629 | 0.00119690 |
| ENSMUSG00000027356 | Fermt1   | 0.21126118 | 0.00000121 |
| ENSMUSG00000037600 | Kdf1     | 0.22898444 | 0.00019828 |
| ENSMUSG00000054065 | Pkp3     | 0.23004457 | 0.00001200 |
| ENSMUSG00000036687 | Tmem184a | 0.23346210 | 0.00391623 |
| ENSMUSG00000041782 | Lad1     | 0.24008499 | 0.00018968 |
| ENSMUSG00000022382 | Wnt7b    | 0.24434985 | 0.00119235 |
| ENSMUSG00000026639 | Lamb3    | 0.24998459 | 0.00490459 |
| ENSMUSG00000023906 | Cldn6    | 0.25378052 | 0.00008879 |
| ENSMUSG00000044279 | Crb3     | 0.26071914 | 0.00347080 |
| ENSMUSG00000039529 | Atp8b1   | 0.26276223 | 0.00012180 |
| ENSMUSG00000050854 | Tmem125  | 0.26545755 | 0.00146051 |
| ENSMUSG00000013611 | Snx31    | 0.26885841 | 0.00209095 |
| ENSMUSG00000040728 | Esrp1    | 0.27298978 | 0.00016382 |
| ENSMUSG00000028841 | Cnksr1   | 0.27634817 | 0.00112757 |
| ENSMUSG00000074923 | Pak6     | 0.28490873 | 0.00127602 |
| ENSMUSG00000055976 | Cldn23   | 0.28976713 | 0.00569818 |
| ENSMUSG00000030873 | Scnn1b   | 0.29398962 | 0.00843697 |
| ENSMUSG00000001583 | Tnk1     | 0.29885471 | 0.00347080 |
| ENSMUSG00000026994 | Galnt3   | 0.30008594 | 0.00029446 |
| ENSMUSG00000020838 | Slc6a4   | 0.30081329 | 0.00231539 |
| ENSMUSG00000032358 | Fam83b   | 0.30521684 | 0.00071769 |
| ENSMUSG00000084128 | Esrp2    | 0.30872825 | 0.00000624 |
| ENSMUSG00000028865 | Cd16412  | 0.31300538 | 0.00925019 |
| ENSMUSG00000018569 | Cldn7    | 0.32148786 | 0.00028219 |
| ENSMUSG00000026668 | Ucma     | 0.32174580 | 0.00816630 |
| ENSMUSG00000026971 | Itgb6    | 0.32301381 | 0.00126446 |
| ENSMUSG00000001672 | Marveld3 | 0.32407576 | 0.00905862 |
| ENSMUSG00000023039 | Krt7     | 0.32495298 | 0.00404390 |
| ENSMUSG00000018581 | Dnah11   | 0.32779336 | 0.00381960 |
| ENSMUSG00000022408 | Fam83f   | 0.33010328 | 0.00051453 |
| ENSMUSG00000057615 | Ldoc1    | 0.33420026 | 0.00316936 |
| ENSMUSG00000021604 | Irx4     | 0.33515957 | 0.00056488 |
| ENSMUSG00000034282 | Evpl     | 0.34113269 | 0.00028219 |
| ENSMUSG00000032092 | Mpzl2    | 0.34530189 | 0.00021393 |
| ENSMUSG00000019866 | Aim1     | 0.34765154 | 0.00005739 |
| ENSMUSG00000021340 | Gpld1    | 0.35400347 | 0.00483717 |
| ENSMUSG00000058600 | Rpl30    | 0.37166902 | 0.00017099 |
| ENSMUSG00000047281 | Sfn      | 0.37237278 | 0.00042625 |
| ENSMUSG00000030739 | Myh14    | 0.37979701 | 0.00121918 |
| ENSMUSG00000045871 | Slitrk6  | 0.40353283 | 0.00974449 |
| ENSMUSG00000017607 | Tns4     | 0.40454179 | 0.00014426 |
| ENSMUSG00000026890 | Lhx6     | 0.40828588 | 0.00031988 |
| ENSMUSG00000034584 | Exph5    | 0.41286430 | 0.00016120 |
| ENSMUSG00000029859 | Epha1    | 0.41999892 | 0.00188004 |
| ENSMUSG00000024331 | Dsc2     | 0.42456523 | 0.00091730 |
| ENSMUSG00000032776 | Mctp2    | 0.42611202 | 0.00397853 |

|                    |               |            |            |
|--------------------|---------------|------------|------------|
| ENSMUSG00000054889 | Dsp           | 0.42815072 | 0.00000794 |
| ENSMUSG00000091243 | Vgll3         | 0.43911755 | 0.00076754 |
| ENSMUSG00000020758 | Itgb4         | 0.44764470 | 0.00211914 |
| ENSMUSG00000044393 | Dsg2          | 0.44989612 | 0.00076227 |
| ENSMUSG00000039813 | Tbc1d2        | 0.45441554 | 0.00022893 |
| ENSMUSG00000033998 | Kcnk1         | 0.45736751 | 0.00018641 |
| ENSMUSG00000030510 | Cers3         | 0.46994748 | 0.00609235 |
| ENSMUSG00000031870 | Pgr           | 0.47170069 | 0.00209095 |
| ENSMUSG00000096225 | Lhx8          | 0.48314879 | 0.00001898 |
| ENSMUSG00000035498 | Cdcp1         | 0.48845768 | 0.00290260 |
| ENSMUSG00000028640 | Tfap2c        | 0.50144955 | 0.00071858 |
| ENSMUSG00000026479 | Lamc2         | 0.50713539 | 0.00230219 |
| ENSMUSG00000029330 | Cds1          | 0.50985861 | 0.00873137 |
| ENSMUSG00000031380 | Figf          | 0.51001175 | 0.00122154 |
| ENSMUSG00000021636 | Marveld2      | 0.51618668 | 0.00861956 |
| ENSMUSG00000068876 | Cgn           | 0.52086206 | 0.00190916 |
| ENSMUSG00000027315 | Spint1        | 0.52394092 | 0.00527843 |
| ENSMUSG00000007888 | Crlf1         | 0.54065941 | 0.00453778 |
| ENSMUSG00000029149 | Krtcap3       | 0.54798414 | 0.00861956 |
| ENSMUSG00000030217 | Art4          | 0.55173831 | 0.00121413 |
| ENSMUSG00000030688 | Stard10       | 0.55201559 | 0.00091316 |
| ENSMUSG00000005251 | Ripk4         | 0.55300184 | 0.00052487 |
| ENSMUSG00000043003 | Rasef         | 0.55570692 | 0.00209095 |
| ENSMUSG00000032561 | Acpp          | 0.56378560 | 0.00816630 |
| ENSMUSG00000070305 | Mpzl3         | 0.56838590 | 0.00220965 |
| ENSMUSG00000021062 | Rab15         | 0.56988053 | 0.00101441 |
| ENSMUSG00000048747 | E130114P18Rik | 0.57260554 | 0.00756277 |
| ENSMUSG00000024511 | Rab27b        | 0.57298877 | 0.00715780 |
| ENSMUSG00000034435 | Tmem30b       | 0.57583037 | 0.00054178 |
| ENSMUSG00000030208 | Emp1          | 0.57917791 | 0.00207737 |
| ENSMUSG00000029032 | Arhgef16      | 0.60211624 | 0.00050122 |
| ENSMUSG00000033227 | Wnt6          | 0.60343685 | 0.00018968 |
| ENSMUSG00000017057 | Il13ra1       | 0.61186822 | 0.00230817 |
| ENSMUSG00000024868 | Dkk1          | 0.62520266 | 0.00527843 |
| ENSMUSG00000026972 | Arrdc1        | 0.62529059 | 0.00056373 |
| ENSMUSG00000051279 | Gdf6          | 0.62626958 | 0.00120688 |
| ENSMUSG00000051323 | Pcdh19        | 0.62833170 | 0.00756277 |
| ENSMUSG00000048450 | Msx1          | 0.63151089 | 0.00551701 |
| ENSMUSG00000074121 | Ntf5          | 0.65498666 | 0.00870000 |
| ENSMUSG00000000093 | Tbx2          | 0.65672912 | 0.00101306 |
| ENSMUSG00000073988 | Ttpa          | 0.65789172 | 0.00174336 |
| ENSMUSG00000033542 | Arhgef5       | 0.66143137 | 0.00041672 |
| ENSMUSG00000056380 | Gpr50         | 0.67389483 | 0.00101049 |
| ENSMUSG00000035964 | Tmem59l       | 0.67433938 | 0.00649329 |
| ENSMUSG00000015133 | Lrrk1         | 0.68039282 | 0.00031534 |
| ENSMUSG00000043496 | Tril          | 0.68129502 | 0.00502307 |
| ENSMUSG00000025915 | Sgk3          | 0.69306642 | 0.00402726 |
| ENSMUSG00000032261 | Sh3bgrl2      | 0.72050204 | 0.00957437 |



|                    |          |            |            |
|--------------------|----------|------------|------------|
| ENSMUSG00000019851 | Perp     | 0.72128268 | 0.00640783 |
| ENSMUSG00000035407 | Kank4    | 0.72378862 | 0.00034617 |
| ENSMUSG00000018604 | Tbx3     | 0.73319259 | 0.00316936 |
| ENSMUSG00000038910 | Plcl2    | 0.74693618 | 0.00097135 |
| ENSMUSG00000024981 | Acsl5    | 0.76864705 | 0.00391623 |
| ENSMUSG00000002068 | Ccne1    | 0.77101757 | 0.00767626 |
| ENSMUSG00000028654 | Mycl     | 0.79219043 | 0.00105981 |
| ENSMUSG00000032221 | Mns1     | 0.79467561 | 0.00916732 |
| ENSMUSG00000025932 | Eya1     | 0.79650085 | 0.00084298 |
| ENSMUSG00000028212 | Ccne2    | 0.80666923 | 0.00579675 |
| ENSMUSG00000019960 | Dusp6    | 0.80691210 | 0.00843697 |
| ENSMUSG00000018585 | Atox1    | 0.80967677 | 0.00470561 |
| ENSMUSG00000025068 | Gsto1    | 0.81148474 | 0.00165399 |
| ENSMUSG00000036528 | Ppfibp2  | 0.81150341 | 0.00973878 |
| ENSMUSG00000001864 | Aif1l    | 0.81717740 | 0.00306096 |
| ENSMUSG00000000753 | Serpinf1 | 0.81797293 | 0.00767626 |
| ENSMUSG00000029125 | Stx18    | 0.82719111 | 0.00905862 |
| ENSMUSG00000031479 | Vps36    | 0.82961248 | 0.00431824 |
| ENSMUSG00000005667 | Mthfd2   | 0.83082749 | 0.00739323 |
| ENSMUSG00000032252 | Gfce     | 0.83796409 | 0.00905862 |
| ENSMUSG00000036781 | Rps27l   | 0.84876987 | 0.00744936 |
| ENSMUSG00000026889 | Rbm18    | 0.86446734 | 0.00845819 |
| ENSMUSG00000031701 | Dnaja2   | 0.86773981 | 0.00551701 |

**Table S2: Genes upregulated in *Grhl2*<sup>-/-</sup> PA1**

| Ensembl ID         | Gene Name | Fold Change (Grhl2KO/WT) | False discovery rate (FDR) |
|--------------------|-----------|--------------------------|----------------------------|
| ENSMUSG00000070870 | Cryge     | 20.93200502              | 0.00935863                 |
| ENSMUSG00000025952 | Crygc     | 11.13315014              | 0.00212075                 |
| ENSMUSG00000031073 | Fgf15     | 8.20879719               | 0.00870000                 |
| ENSMUSG00000042115 | Klhdc8a   | 7.99758484               | 0.00979781                 |
| ENSMUSG00000032085 | Tagln     | 5.63269220               | 0.00016120                 |
| ENSMUSG00000058669 | Nkx2-9    | 4.64343132               | 0.00861956                 |
| ENSMUSG00000025586 | Cpeb1     | 4.57124494               | 0.00715780                 |
| ENSMUSG00000048096 | Lmod1     | 4.44006082               | 0.00010809                 |
| ENSMUSG00000032269 | Htr3a     | 3.85897266               | 0.00146051                 |
| ENSMUSG00000020734 | Grin2c    | 3.71175988               | 0.00146051                 |
| ENSMUSG00000055874 | Foxi3     | 3.28709016               | 0.00591308                 |
| ENSMUSG00000048562 | Sp8       | 3.21504605               | 0.00095689                 |
| ENSMUSG00000022144 | Gdnf      | 3.10256959               | 0.00019359                 |
| ENSMUSG00000028661 | Epha8     | 2.60265002               | 0.00204782                 |
| ENSMUSG00000074607 | Tox2      | 2.59578899               | 0.00460869                 |
| ENSMUSG00000001663 | Gstt1     | 2.44241251               | 0.00588191                 |
| ENSMUSG00000022887 | Masp1     | 2.39138959               | 0.00174336                 |
| ENSMUSG00000001930 | Vwf       | 2.34180644               | 0.00670994                 |
| ENSMUSG00000035513 | Ntng2     | 2.17579448               | 0.00887497                 |
| ENSMUSG00000027358 | Bmp2      | 2.16605081               | 0.00072499                 |
| ENSMUSG00000034205 | Loxl2     | 2.15180921               | 0.00217454                 |
| ENSMUSG00000041912 | Tdrkh     | 2.13708255               | 0.00673460                 |
| ENSMUSG00000029309 | Sparcl1   | 2.13045563               | 0.00744936                 |
| ENSMUSG00000006445 | Epha2     | 2.09849930               | 0.00000210                 |
| ENSMUSG00000067818 | Myl9      | 2.07678761               | 0.00756277                 |
| ENSMUSG00000031273 | Col4a6    | 2.07446266               | 0.00027094                 |
| ENSMUSG00000028370 | Pappa     | 2.06306098               | 0.00222866                 |
| ENSMUSG00000006930 | Hap1      | 2.05157753               | 0.00497179                 |
| ENSMUSG00000009772 | Nuak2     | 2.04785892               | 0.00282357                 |
| ENSMUSG00000031654 | Cbln1     | 2.02634512               | 0.00209095                 |
| ENSMUSG00000041957 | Pkp2      | 2.02245999               | 0.00650198                 |
| ENSMUSG00000036834 | Plch1     | 2.00941550               | 0.00089061                 |
| ENSMUSG00000027584 | Oprl1     | 1.96400744               | 0.00453778                 |
| ENSMUSG00000044220 | Nkx2-3    | 1.93228483               | 0.00756277                 |
| ENSMUSG00000020427 | Igfbp3    | 1.91211825               | 0.00018641                 |
| ENSMUSG00000031517 | Gpm6a     | 1.90186644               | 0.00316936                 |
| ENSMUSG00000024087 | Cyp1b1    | 1.90148547               | 0.00902323                 |
| ENSMUSG00000029765 | Plxna4    | 1.88187828               | 0.00744936                 |
| ENSMUSG00000022489 | Pdelb     | 1.84416914               | 0.00219172                 |
| ENSMUSG00000042734 | Ttc9      | 1.81769105               | 0.00237283                 |
| ENSMUSG00000069170 | Adgrv1    | 1.78601625               | 0.00816630                 |
| ENSMUSG00000006567 | Atp7b     | 1.78325235               | 0.00861956                 |
| ENSMUSG00000027750 | Postn     | 1.78107640               | 0.00630807                 |
| ENSMUSG00000041592 | Sdk2      | 1.74620656               | 0.00101306                 |

|                    |          |            |            |
|--------------------|----------|------------|------------|
| ENSMUSG00000054364 | Rhob     | 1.74401098 | 0.00692532 |
| ENSMUSG00000035095 | Fam167a  | 1.70085997 | 0.00451050 |
| ENSMUSG00000031825 | Crispld2 | 1.67816596 | 0.00470562 |
| ENSMUSG00000022367 | Has2     | 1.65589158 | 0.00016854 |
| ENSMUSG00000031075 | Ano1     | 1.65336249 | 0.00178688 |
| ENSMUSG00000069763 | Tmem100  | 1.61941627 | 0.00608161 |
| ENSMUSG00000023067 | Cdkn1a   | 1.61836928 | 0.00883396 |
| ENSMUSG00000024008 | Cpne5    | 1.60347761 | 0.00292285 |
| ENSMUSG00000058897 | Col25a1  | 1.57936902 | 0.00130637 |
| ENSMUSG00000049336 | Tenm2    | 1.57699614 | 0.00453778 |
| ENSMUSG00000039167 | Adgrl4   | 1.57362576 | 0.00905862 |
| ENSMUSG00000022206 | Npr3     | 1.57105814 | 0.00377255 |
| ENSMUSG00000024304 | Cdh2     | 1.56733886 | 0.00127740 |
| ENSMUSG00000034903 | Cobll1   | 1.55192173 | 0.00861956 |
| ENSMUSG00000074622 | Mafb     | 1.54298282 | 0.00488561 |
| ENSMUSG00000040289 | Hey1     | 1.53517303 | 0.00417367 |
| ENSMUSG00000037239 | Spred3   | 1.53212784 | 0.00307079 |
| ENSMUSG00000032452 | Clstn2   | 1.51003095 | 0.00762493 |
| ENSMUSG00000030376 | Slc8a2   | 1.50759374 | 0.00732989 |
| ENSMUSG00000043639 | Rbm20    | 1.50121193 | 0.00488561 |
| ENSMUSG00000017009 | Sdc4     | 1.48073688 | 0.00497179 |
| ENSMUSG00000032334 | Loxl1    | 1.47882873 | 0.00609235 |
| ENSMUSG00000018593 | Sparc    | 1.47452739 | 0.00003151 |
| ENSMUSG00000032850 | Rnft2    | 1.46937662 | 0.00922925 |
| ENSMUSG00000028464 | Tpm2     | 1.46568506 | 0.00417367 |
| ENSMUSG00000031626 | Sorbs2   | 1.46364864 | 0.00306096 |
| ENSMUSG00000050373 | Snx21    | 1.45009260 | 0.00347080 |
| ENSMUSG00000021009 | Ptpn21   | 1.44553923 | 0.00861956 |
| ENSMUSG00000001870 | Ltbp1    | 1.44440455 | 0.00049766 |
| ENSMUSG00000026185 | Igfbp5   | 1.43831432 | 0.00862263 |
| ENSMUSG00000047497 | Adamts12 | 1.43823569 | 0.00222866 |
| ENSMUSG00000007038 | Neu1     | 1.41145423 | 0.00209095 |
| ENSMUSG00000003534 | Ddr1     | 1.40734217 | 0.00028219 |
| ENSMUSG00000031274 | Col4a5   | 1.40081904 | 0.00023310 |
| ENSMUSG00000020032 | Nuak1    | 1.39635236 | 0.00889694 |
| ENSMUSG00000074505 | Fat3     | 1.39578881 | 0.00907772 |
| ENSMUSG00000054708 | Ankrd24  | 1.39152317 | 0.00999390 |
| ENSMUSG00000046329 | Slc25a23 | 1.38475955 | 0.00071769 |
| ENSMUSG00000033453 | Adamts15 | 1.36682355 | 0.00704642 |
| ENSMUSG00000062031 | Athl1    | 1.36410375 | 0.00636037 |
| ENSMUSG00000029287 | Tgfbr3   | 1.36021369 | 0.00316936 |
| ENSMUSG00000038267 | Slc22a23 | 1.35278049 | 0.00453778 |
| ENSMUSG00000052105 | Mtcl1    | 1.34430890 | 0.00441082 |
| ENSMUSG00000039706 | Ldb2     | 1.34321370 | 0.00521437 |
| ENSMUSG00000004891 | Nes      | 1.31724674 | 0.00910610 |
| ENSMUSG00000052713 | Zfp608   | 1.31701863 | 0.00715780 |
| ENSMUSG00000041633 | Kctd12b  | 1.30489057 | 0.00469979 |
| ENSMUSG00000052911 | Lamb2    | 1.30219420 | 0.00710286 |

|                    |               |            |            |
|--------------------|---------------|------------|------------|
| ENSMUSG00000008855 | Hdac5         | 1.30083249 | 0.00281834 |
| ENSMUSG00000040502 | 38411         | 1.28889340 | 0.00905862 |
| ENSMUSG00000034993 | Vat1          | 1.28670263 | 0.00770755 |
| ENSMUSG00000031558 | Slit2         | 1.28096181 | 0.00816630 |
| ENSMUSG00000027111 | Itga6         | 1.27514996 | 0.00054178 |
| ENSMUSG00000029070 | Mxra8         | 1.27330064 | 0.00553860 |
| ENSMUSG00000027669 | Gnb4          | 1.27178909 | 0.00204157 |
| ENSMUSG00000034037 | Fgd5          | 1.26580719 | 0.00733749 |
| ENSMUSG00000006403 | Adamts4       | 1.26455568 | 0.00770755 |
| ENSMUSG00000025579 | Gaa           | 1.26366282 | 0.00527535 |
| ENSMUSG00000021806 | Nid2          | 1.26131517 | 0.00114956 |
| ENSMUSG00000061353 | Cxcl12        | 1.25029847 | 0.00265696 |
| ENSMUSG00000026478 | Lamc1         | 1.24845867 | 0.00803935 |
| ENSMUSG00000023830 | Igf2r         | 1.24230477 | 0.00921781 |
| ENSMUSG00000040841 | Six5          | 1.24100084 | 0.00347080 |
| ENSMUSG00000031555 | Adam9         | 1.24050786 | 0.00174336 |
| ENSMUSG00000013236 | Ptprs         | 1.23393543 | 0.00269740 |
| ENSMUSG00000025278 | Flnb          | 1.22603941 | 0.00488561 |
| ENSMUSG00000019467 | Arhgef25      | 1.22574663 | 0.00905862 |
| ENSMUSG00000075254 | Heg1          | 1.22527805 | 0.00796836 |
| ENSMUSG00000031367 | Ap1s2         | 1.22508854 | 0.00526471 |
| ENSMUSG00000007041 | Clic1         | 1.21637312 | 0.00678991 |
| ENSMUSG00000029869 | Ephb6         | 1.19696741 | 0.00935863 |
| ENSMUSG00000002900 | Lamb1         | 1.17427310 | 0.00816630 |
| ENSMUSG00000032666 | 1700025G04Rik | 1.16811231 | 0.00765558 |



**Table S3: Genes down-regulated in *Grhl2*<sup>-/-</sup> PA1 from key ontologies**

| Gene Ontology                                             | Genes                                                                                                                                       |
|-----------------------------------------------------------|---------------------------------------------------------------------------------------------------------------------------------------------|
| desmosome organization (GO:0002934)                       | Pkp3, Dsg2, Dsp, Perp                                                                                                                       |
| bi-cellular tight junction assembly (GO:0070830)          | Marveld2, Cgn, Grhl2, Marveld3, Cdh1                                                                                                        |
| multicellular organismal water homeostasis (GO:0050891)   | Scnn1b, Tmprss13, Cldn4, Sfn, Kdf1, Scnn1g, Cdh1                                                                                            |
| regulation of epidermal cell differentiation (GO:0045604) | Esrp1, Mycl, Ovol2, Sfn, Kdf1, Grhl2                                                                                                        |
| odontogenesis of dentin-containing tooth (GO:0042475)     | Wnt6, Itgb4, Wnt7b, Msx1, Lhx8, Dsp, Perp                                                                                                   |
| keratinocyte differentiation (GO:0030216)                 | Evpl, Cers3, St14, Tfap2c, Exph5, Sfn, Kdf1, Dsp, Ppl                                                                                       |
| epithelial cell development (GO:0002064)                  | Marveld2, St14, Tfap2c, Exph5, Sfn, Slitrk6, Cgn, Kdf1, Rab25, Wnt7b, Grhl2, Pgr, Cdh1                                                      |
| morphogenesis of a branching epithelium (GO:0061138)      | Esrp1, St14, Wnt6, Tfap2c, Spint1, Tbx3, Esrp2, Grhl2, Eya1, Pgr, Dsp                                                                       |
| epithelial tube morphogenesis (GO:0060562)                | Esrp1, St14, Wnt6, Tfap2c, Ovol2, Spint1, Tbx3, Esrp2, Grhl2, Tbx2, Eya1, Pgr, Dsp, Taastd2                                                 |
| cell adhesion (GO:0007155)                                | Lypd3, Itgb6, Lamb3, Pcdh19, Mpzl2, EphA1, Pkp3, Epcam, Itgb4, Lamc2, Wnt7b, Mpzl3, Grhl2, Pvr14, Fat2, Dsg2, Dsc2, Fermt1, Cdh1, Dsp, Perp |

**Table S4: Genes up-regulated in *Grhl2*<sup>-/-</sup> PA1 from key ontologies**

| Gene Ontology                                                          | Genes                                                                                             |
|------------------------------------------------------------------------|---------------------------------------------------------------------------------------------------|
| cardiac epithelial to mesenchymal transition (GO:0060317)              | Has2, Tmem100, Tgfbr3, Bmp2, Hey1                                                                 |
| osteoblast differentiation (GO:0001649)                                | Tgfbr3, Igfbp5, EphA2, Bmp2, Igfbp3, Hdac5, Hey1                                                  |
| cell-substrate adhesion (GO:0031589)                                   | Itga6, Nid2, Adam9, Ddr1, Lamb1, Adamts12, Vwf, Lamc1, Lamb2                                      |
| cell-cell adhesion via plasma-membrane adhesion molecules (GO:0098742) | Clstn2, Ptprs, Tenm2, Cdh2, Ntng2, Sparcl1, Fat3, Sdk2, Cbln1                                     |
| axon guidance (GO:0007411)                                             | Slit2, EphA8, Cxcl12, Tenm2, Gdnf, EphA2, Ephb6, Lamb2, Ntng2, Plxna4                             |
| extracellular matrix organization (GO:0030198)                         | Has2, Crispld2, Col4a6, Postn, Cyp1b1, Col4a5, Lamb1, Loxl2, Lamc1, Col25a1, Lamb2                |
| regulation of synapse organization (GO:0050807)                        | Clstn2, Ptprs, Sparc, Neu1, Sorbs2, Cdh2, Ntng2, Sparcl1, Gpm6a, Cbln1                            |
| response to growth factor (GO:0070848)                                 | Adam9, Has2, Tmem100, Tgfbr3, Ltbp1, Adamts12, Sparc, Gdnf, EphA2, Bmp2, Fgf15, Hap1              |
| blood vessel morphogenesis (GO:0048514)                                | Slit2, Heg1, Has2, Tmem100, Cxcl12, Tgfbr3, Cyp1b1, Loxl2, Rhob, EphA2, Cdh2, Hey1                |
| enzyme linked receptor protein signaling pathway (GO:0007167)          | EphA8, Adam9, Tmem100, Col4a6, Tgfbr3, Col4a5, Ddr1, Ltbp1, Gdnf, EphA2, Bmp2, Ephb6, Fgf15, Hap1 |

**Table S5: Oligonucleotide primer sequences.**

| Use                    | Target gene | Direction               | Sequence                  |
|------------------------|-------------|-------------------------|---------------------------|
| QRTPCR                 | Cdh1        | forward                 | GGACCGAGAGAGTTACCCT       |
|                        |             | reverse                 | CCCTGATACGTGCTTGGGT       |
|                        | Cdh2        | forward                 | CAGCCCCTTCTCAATGTGAAAT    |
|                        |             | reverse                 | CTTGAAATCTGCTGGCTCGC      |
|                        | Epcam       | forward                 | CATTTGCTCCAAACTGGCGT      |
|                        |             | reverse                 | TTGTTCTGGATCGCCCCTTC      |
|                        | Vim         | forward                 | TGCACGATGAAGAGATCCAGG     |
|                        |             | reverse                 | CTCCTGGAGGTTCTTGGCAG      |
|                        | Grhl2       | forward                 | TGCAACAACCTCCTCTGATGG     |
|                        |             | reverse                 | TAAACCTGTCCGGTCCTCTG      |
|                        | Ovol1       | forward                 | AGCCTTCGAGACTCCAGCTA      |
|                        |             | reverse                 | AGGTCACCTTCATCTTGGTTTCG   |
|                        | Ovol2       | forward                 | AACTCCAGAGCTTCACGACG      |
|                        |             | reverse                 | TGTGCCGGTGGTAAACTTGA      |
|                        | Grhl3       | forward                 | AGCCAACCAGAGACGGATC       |
|                        |             | reverse                 | AGGCCTCGTCCTCATTACTG      |
|                        | Prrx1       | forward                 | GGAGCAACCCATCGTACCTC      |
|                        |             | reverse                 | CATGGCGCTGTACGGAGA        |
|                        | Snail       | forward                 | TAGGTCGCTCTGGCCAACAT      |
|                        |             | reverse                 | CTGGAAGGTGAACTCCACACA     |
|                        | Twist1      | forward                 | CCGGAGACCTAGATGTCATTGT    |
|                        |             | reverse                 | CCACGCCCTGATTCTTGTGA      |
|                        | Zeb1        | forward                 | GCCAAACGGAAACCAGGATG      |
|                        |             | reverse                 | GGCGTGGAGTCAGAGTCATT      |
|                        | Zeb2        | forward                 | TACCTTCAGCGAAGCGACAC      |
|                        |             | reverse                 | GTTCCAGGTGGCAGGTCATT      |
|                        | Actb        | forward                 | GATATCGCTGCGCTGGTCGTC     |
|                        |             | reverse                 | ACGCAGCTCATTGTAGAAGGTGTGG |
|                        | Esrp2       | forward                 | TCTACGACCTCCGCAGAGAA      |
|                        |             | reverse                 | CTAGTCCCAAGTCCTGTGCC      |
|                        | Esrp1       | forward                 | CTGGCACCGTGGTCAGAAT       |
|                        |             | reverse                 | TCCTCGGTTGCATACTGGTAAC    |
|                        | miR-141-3p  | for                     | TAACACTGTCTGGTAAAGATGG    |
| miR-200a-3p            | for         | TAACACTGTCTGGTAACGATGT  |                           |
| miR-200b-3p            | for         | TAATACTGCCTGGTAATGATGA  |                           |
| miR-200c-3p            | for         | TAATACTGCCGGGTAATGATGGA |                           |
| miR-429-3p             | for         | TAATACTGTCTGGTAATGCCGT  |                           |
| Fgfr2(epithelial)      | forward     | AGGTTTACAGCGATGCCAG     |                           |
|                        | reverse     | TTATCCCCGAGTGCTTCAGGA   |                           |
| Fgfr2<br>(mesenchymal) | forward     | CGTGCTTGGCGGGTAATTCT    |                           |
|                        | reverse     | CTTCTCTCTCACAGGCGCTGG   |                           |
| Cd44 (epithelial)      | forward     | ACATTACATGGAGAGCCGGA    |                           |
|                        | reverse     | CGCCGCTCTTAGTGCTAGAT    |                           |
| Cd44<br>(mesenchymal)  | forward     | CTTGGCCACCAGAGATCGAG    |                           |
|                        | reverse     | TGTCCTGGTTCGCACTTGAG    |                           |
| Ctnnd (epithelial)     | forward     | ATTTGAGCTCTCTCCTTCCTGC  |                           |

|          |                         |                            |                        |
|----------|-------------------------|----------------------------|------------------------|
|          |                         | reverse                    | GGTCCCCTCACTTCACACTG   |
|          | Ctnnd1<br>(mesenchymal) | forward                    | CGAACCTCGCTGGATTTGTC   |
|          |                         | reverse                    | AACCGGCCGTTCTCAAATGT   |
|          | Enah (epithelial)       | forward                    | ACTGCTAAGGCCCATCAAC    |
|          |                         | reverse                    | GGTGTGGATTTGGGTCTGGA   |
|          | Enah<br>(mesenchymal)   | forward                    | CTCCAGACGGGATTCTCCAAG  |
|          |                         | reverse                    | AGGTGTGGATTTGGGTCTGTG  |
| CHIP     | MyoD                    | forward                    | ACACGACTGCTTTCTTCACCA  |
|          |                         | reverse                    | AAGCCGTGAGAGTCGTCTTA   |
|          | Arhgef19                | forward                    | GAGCTTCTGGGAGGCATAGG   |
|          |                         | reverse                    | CTGTCTCAACGTGCCTGCT    |
|          | Cdh1                    | forward                    | TGGTTGAAAGTTCCCCTAAGC  |
|          |                         | reverse                    | CCGTTTGCAAAGCAGTGT     |
|          | Cldn4                   | forward                    | CTTTGTTGGCCAAGCTC      |
|          |                         | reverse                    | CCACAGGTGCTGCAGTTAAA   |
|          | Epcam                   | forward                    | TGCTTTTTCTCCCGCCAGTAG  |
|          |                         | reverse                    | CTGTTCAAGCCCCAGTTTGG   |
|          | Esrp1                   | forward                    | CGAGCAACCGAGATGGTCA    |
|          |                         | reverse                    | GCGGGGAATCTGGAAAACCA   |
|          | Esrp2                   | forward                    | AGGCCTTTTACTTCCCAGGC   |
|          |                         | reverse                    | GGACAGGGAGTGGAGACTCA   |
|          | Mir200b                 | forward                    | TGCCTCGATACTGGGGGTG    |
|          |                         | reverse                    | CTCTCCCTACATGGTGTCTCA  |
|          | Mir205                  | forward                    | AACTTGGCTGAGAGGTGCAT   |
|          |                         | reverse                    | GAAGCTGGAAAGAGAGGGGG   |
|          | Ovol1                   | forward                    | CGGTGACAACCCACCTATTT   |
|          |                         | reverse                    | GGGTGCTTCTGGGTGTGG     |
|          | Ovol2                   | forward                    | CATTCATGCCTAAGGAAGGGCT |
|          |                         | reverse                    | GCCCTGCAACATAACGGTG    |
|          | Zeb1                    | forward                    | GCAAACTTTTCCCTCGCCT    |
|          |                         | reverse                    | ACGACACTCGAGGCTTTACG   |
|          | Mir200b -ve             | forward                    | CTTGTCCCCAAACACAGAT    |
|          |                         | reverse                    | ACCCACATCTTCAGGCTGTC   |
|          | Mir205 -ve              | forward                    | CTTTGCCACCTGCTAACTCC   |
|          |                         | reverse                    | GGTCTGGGTAGGCACACATC   |
|          | Esrp1 -ve               | forward                    | AGGGTAGGGGGCAGAGTAAA   |
|          |                         | reverse                    | GGACGACCCCTTTACTGACA   |
|          | Esrp2 -ve               | forward                    | GGCAGAGACCAAGTGATCTACC |
|          |                         | reverse                    | CCTTCTCTCCCTCCCCT      |
|          | Ovol1 -ve               | forward                    | AAATGTTTGCCGGAACAGAC   |
|          |                         | reverse                    | TGAACCGTATCCACCTGTGA   |
|          | Ovol2 -ve               | forward                    | CCAGCATCTTAAGCGGATCT   |
|          |                         | reverse                    | TCTTCAATGGTTCCCAAAGC   |
| Zeb1 -ve | forward                 | AAGGCATGTTTATGGTATGTTATCTC |                        |
|          | reverse                 | CCCCTTTTCAAAGGAGGAAT       |                        |
